# Supplementary material for: Activation of interferon regulatory factor 3 by replication-competent vaccinia viruses improves antitumor efficacy mediated by T cell responses
Source: Mol Ther Oncolytics. 2021 Jun 4;22:399–409. doi: 10.1016/j.omto.2021.06.001 (PMC8430050; doi:10.1016/j.omto.2021.06.001)
Supplement: Document S1. Figures S1–S4 [file mmc1.pdf]

**Supplemental information**

**Activation of interferon regulatory factor 3 by  
replication-competent vaccinia viruses improves  
antitumor efficacy mediated by T cell responses**

**Stephanie Riederer, Robert Fux, Michael H. Lehmann, Asisa Volz, Gerd Sutter, and Juan J. Rojas**

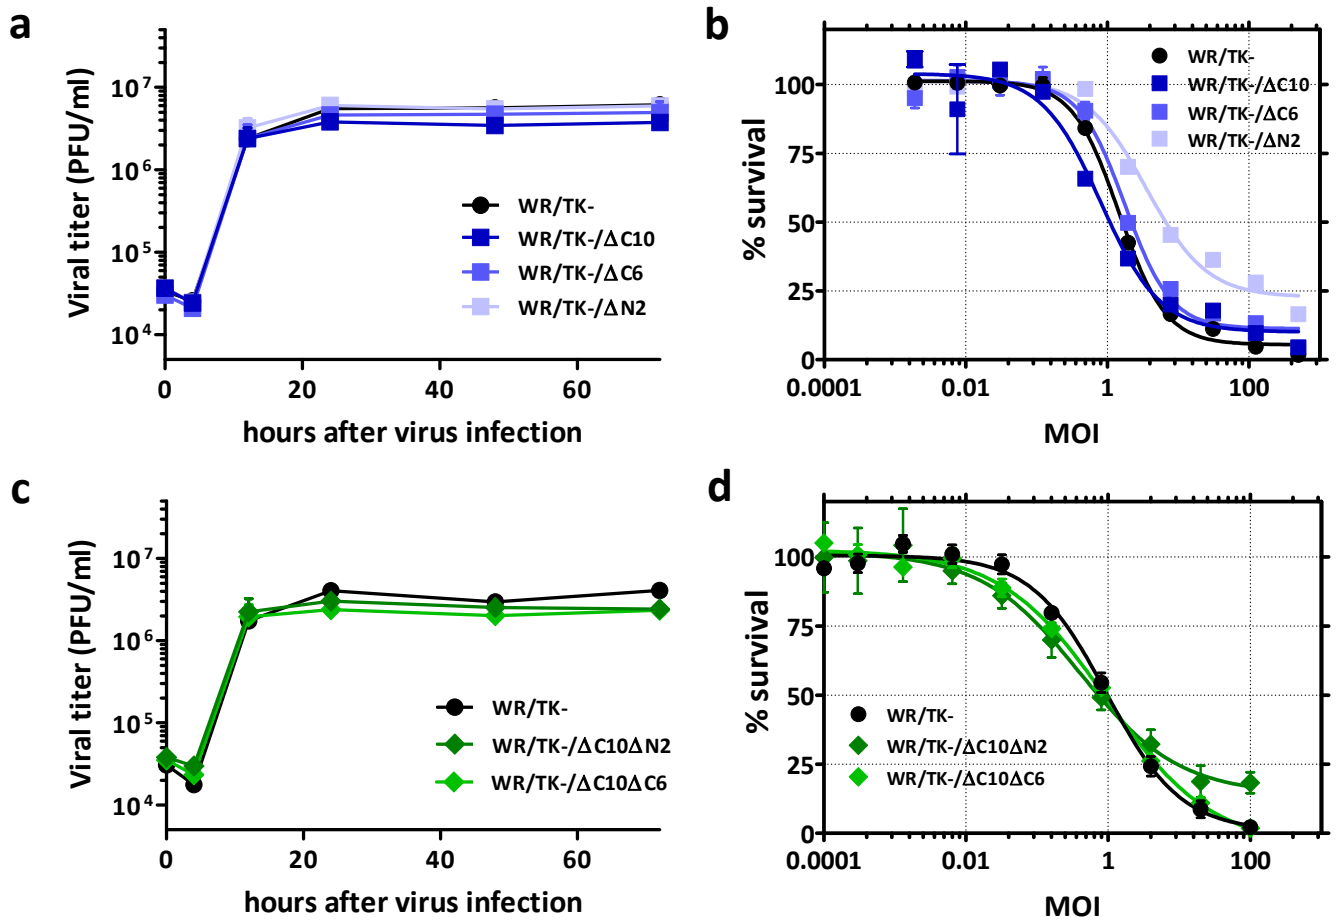

**Supplementary Figure 1. Replication and cytotoxicity of various deletion mutant VACV.** (a) Viral production of single-gene deleted viruses in HeLa cells. HeLa cells were infected with a multiplicity of infection (MOI) of 5 and, at indicated time points, samples were collected and viral titers were determined by plaque-assay. (b) Comparative cytotoxicity of single-gene deleted viruses in HeLa cells. HeLa cells were infected with indicated viruses at doses ranging from 200 to 0.001 PFU/cell. After 72 hours, % of cell death was evaluated. (c) Productive growth of double-gene deleted viruses in HeLa cells. HeLa cells were infected and treated as in (a) with indicated viruses. (d) Comparative cytotoxicity of double-gene deleted viruses in HeLa cells. HeLa cells were infected and treated as in (b) with indicated viruses.

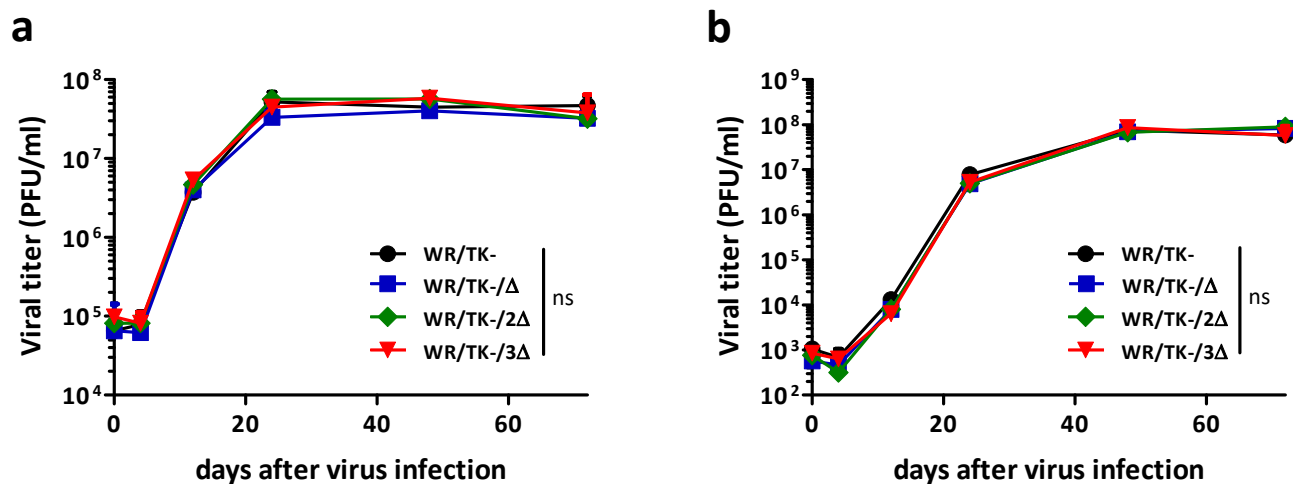

**Supplementary Figure 2. Viral progeny production in A549 cells.** A549 cells were infected with a multiplicity of infection (MOI) of 5 (a) or 0.05 (b) and, at indicated time points, samples were collected and viral titers were determined by plaque-assay. ns: not significant.

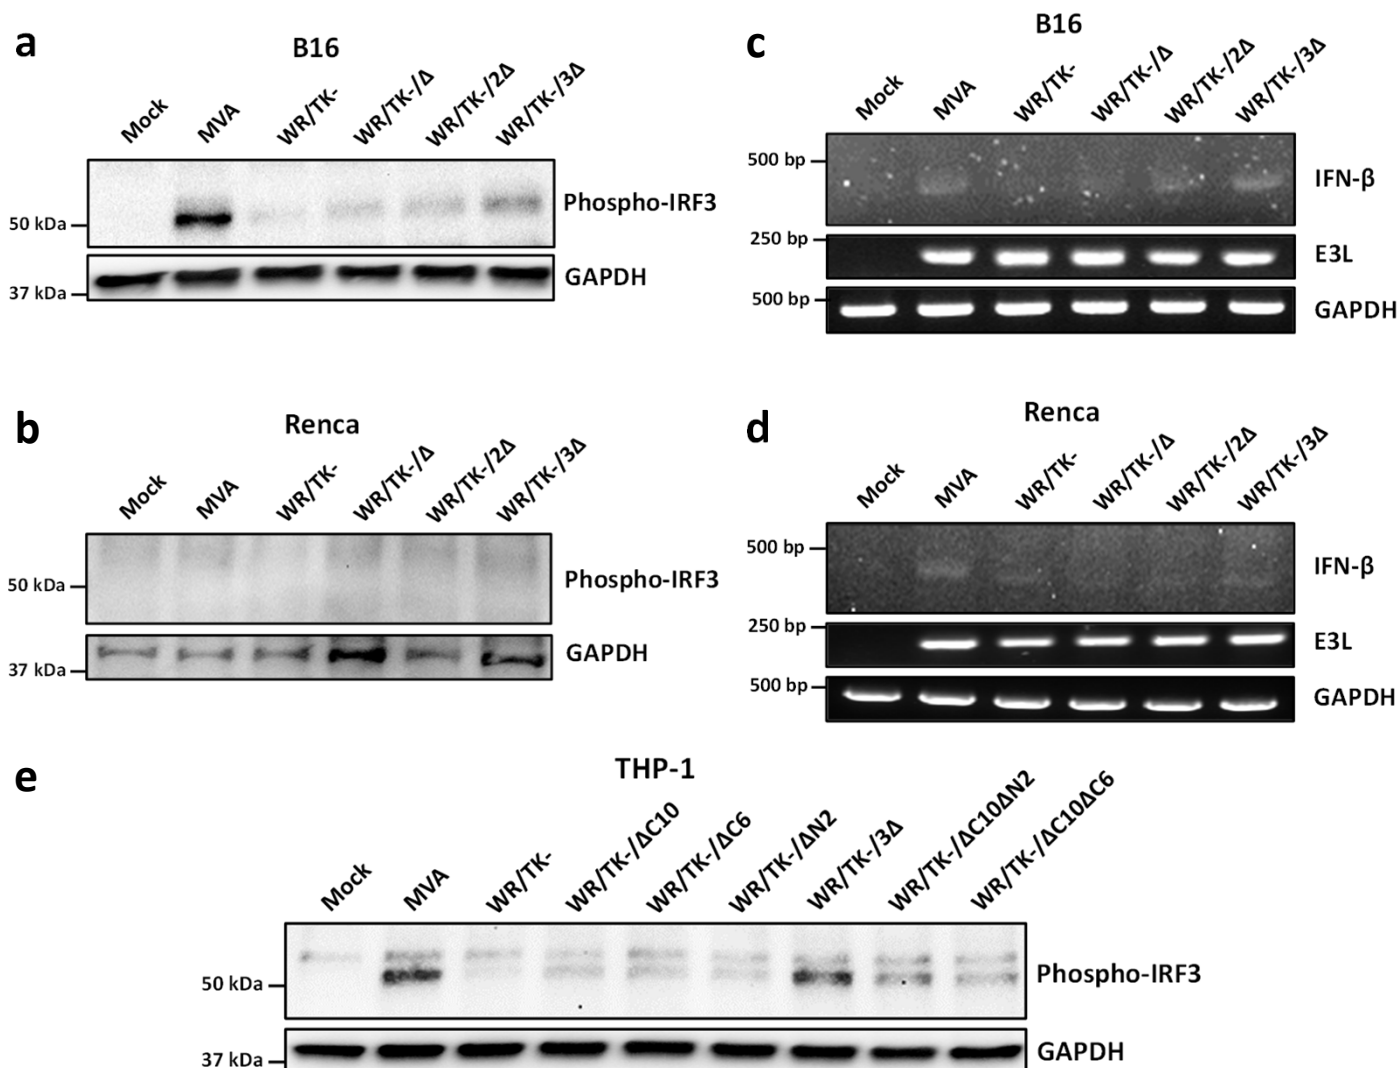

**Supplementary Figure 3. Accumulation of genomic deletions is needed for activation of IRF3.** (a-b) Phosphorylation of IRF3 after infection of mouse tumor cells. B16 (a) or Renca (b) cells were infected at a MOI of 10 and, 5 hours after infection, cells were lysed and Western Blot analysis was performed using a monoclonal antibody against phosphor-IRF3. MVA (Modified Vaccinia virus Ankara) served as a positive control and GAPDH-specific immunoblotting as a loading control. (c-d) Detection of IFN-β mRNA by RT-PCR after infection of mouse tumor cells. B16 (c) or Renca (d) cells were infected at a MOI of 5 and, 6 hours later, total RNA was obtained and the indicated mRNA of the indicated genes were amplified by RT-PCR. The VACV E3L mRNA was used as an infection control and GAPDH mRNA as a loading control. (e) Phosphorylation of IRF3 after infection with oncolytic viruses including all the possible combinations of target gene deletions. Human THP-1 cells were infected with indicated deletion mutant viruses at a MOI of 10 and, 5 hours after infection, cells were lysed and Western Blot analysis was performed using a monoclonal antibody against Phospho-IRF3. Vaccinia MVA strain was used as a positive control and GAPDH-blotting as a loading control.

**a**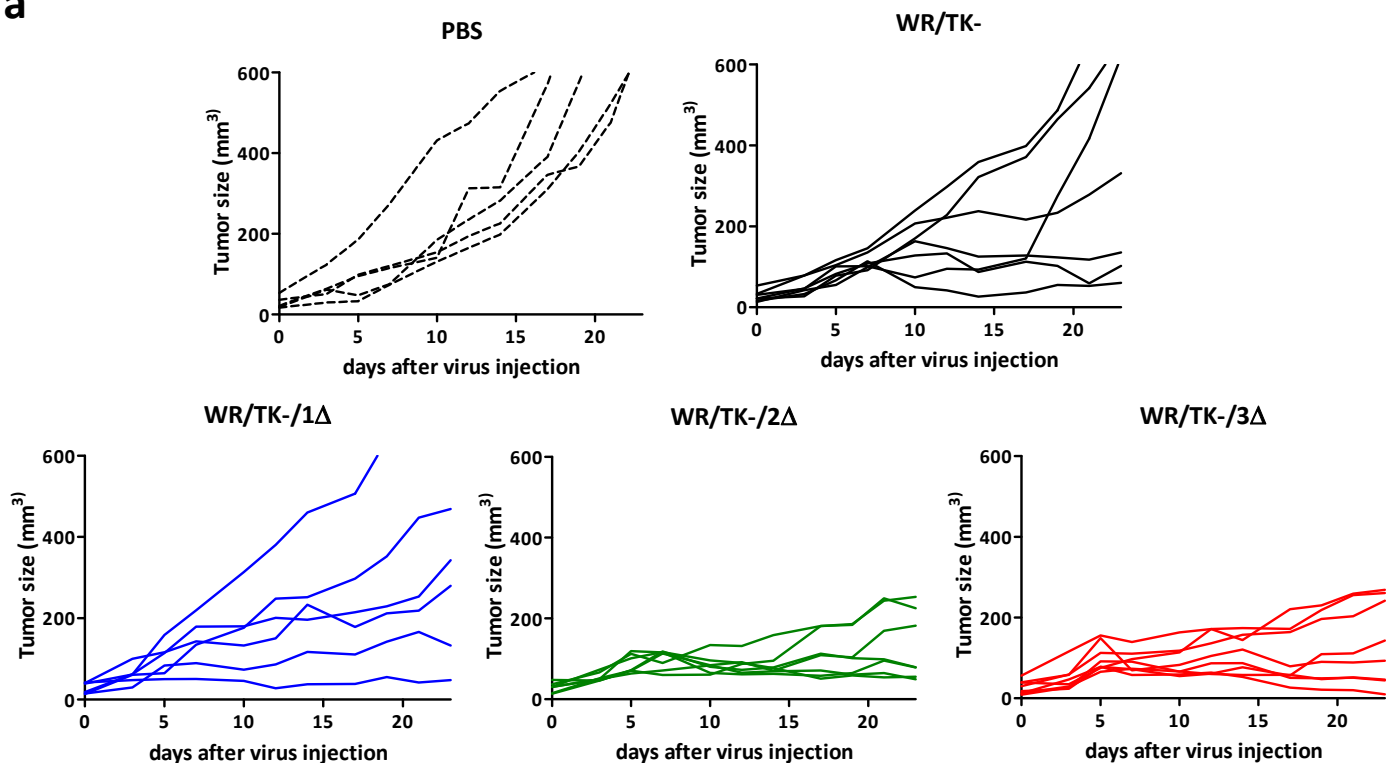**b**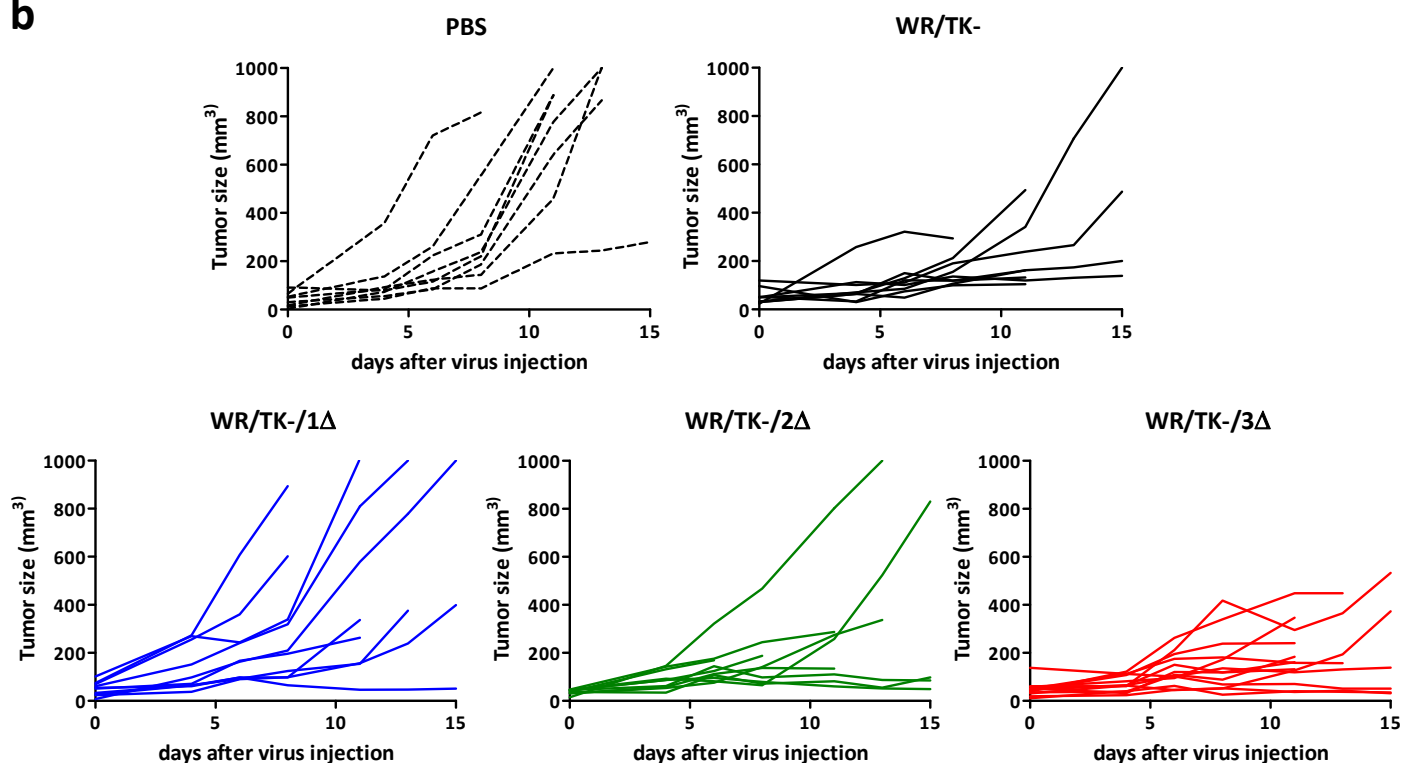

**Supplementary Figure 4. Tumor growth curves of individual animals treated with candidate oncolytic VACV.** Mean of treatments are shown in Figure 5. In short, mice with subcutaneous Renca (a) or B16 (b) tumors were treated by intratumoral injection with two doses of  $1 \times 10^7$  PFU of indicated viruses and tumor growth was monitored. Tumor growth of individual mice are depicted.
